# Supplementary material for: SnugDock: Paratope Structural Optimization during Antibody-Antigen Docking Compensates for Errors in Antibody Homology Models
Source: PLOS journal article supplement (doi:10.1371/journal.pcbi.1000644), 2010-01-22

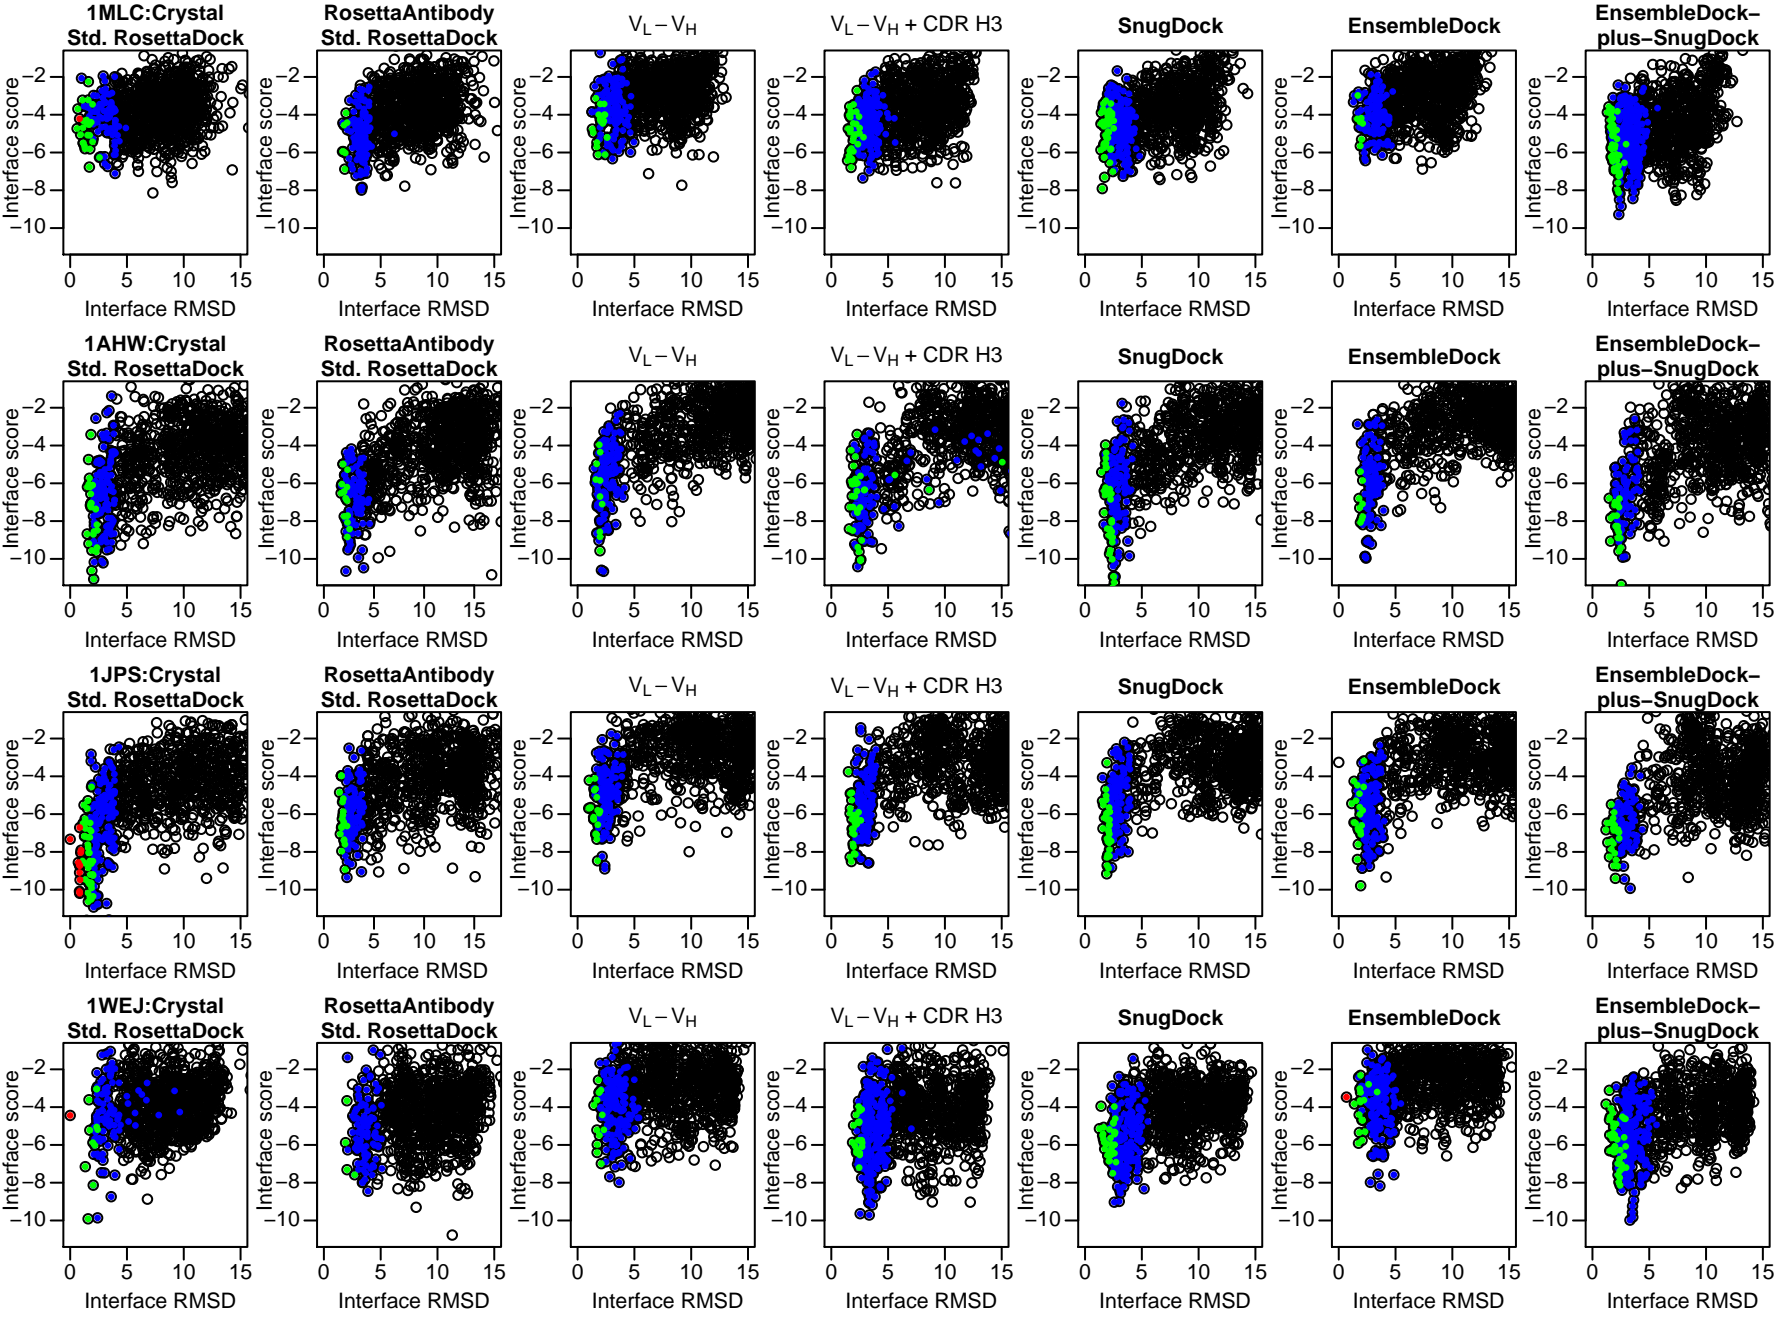

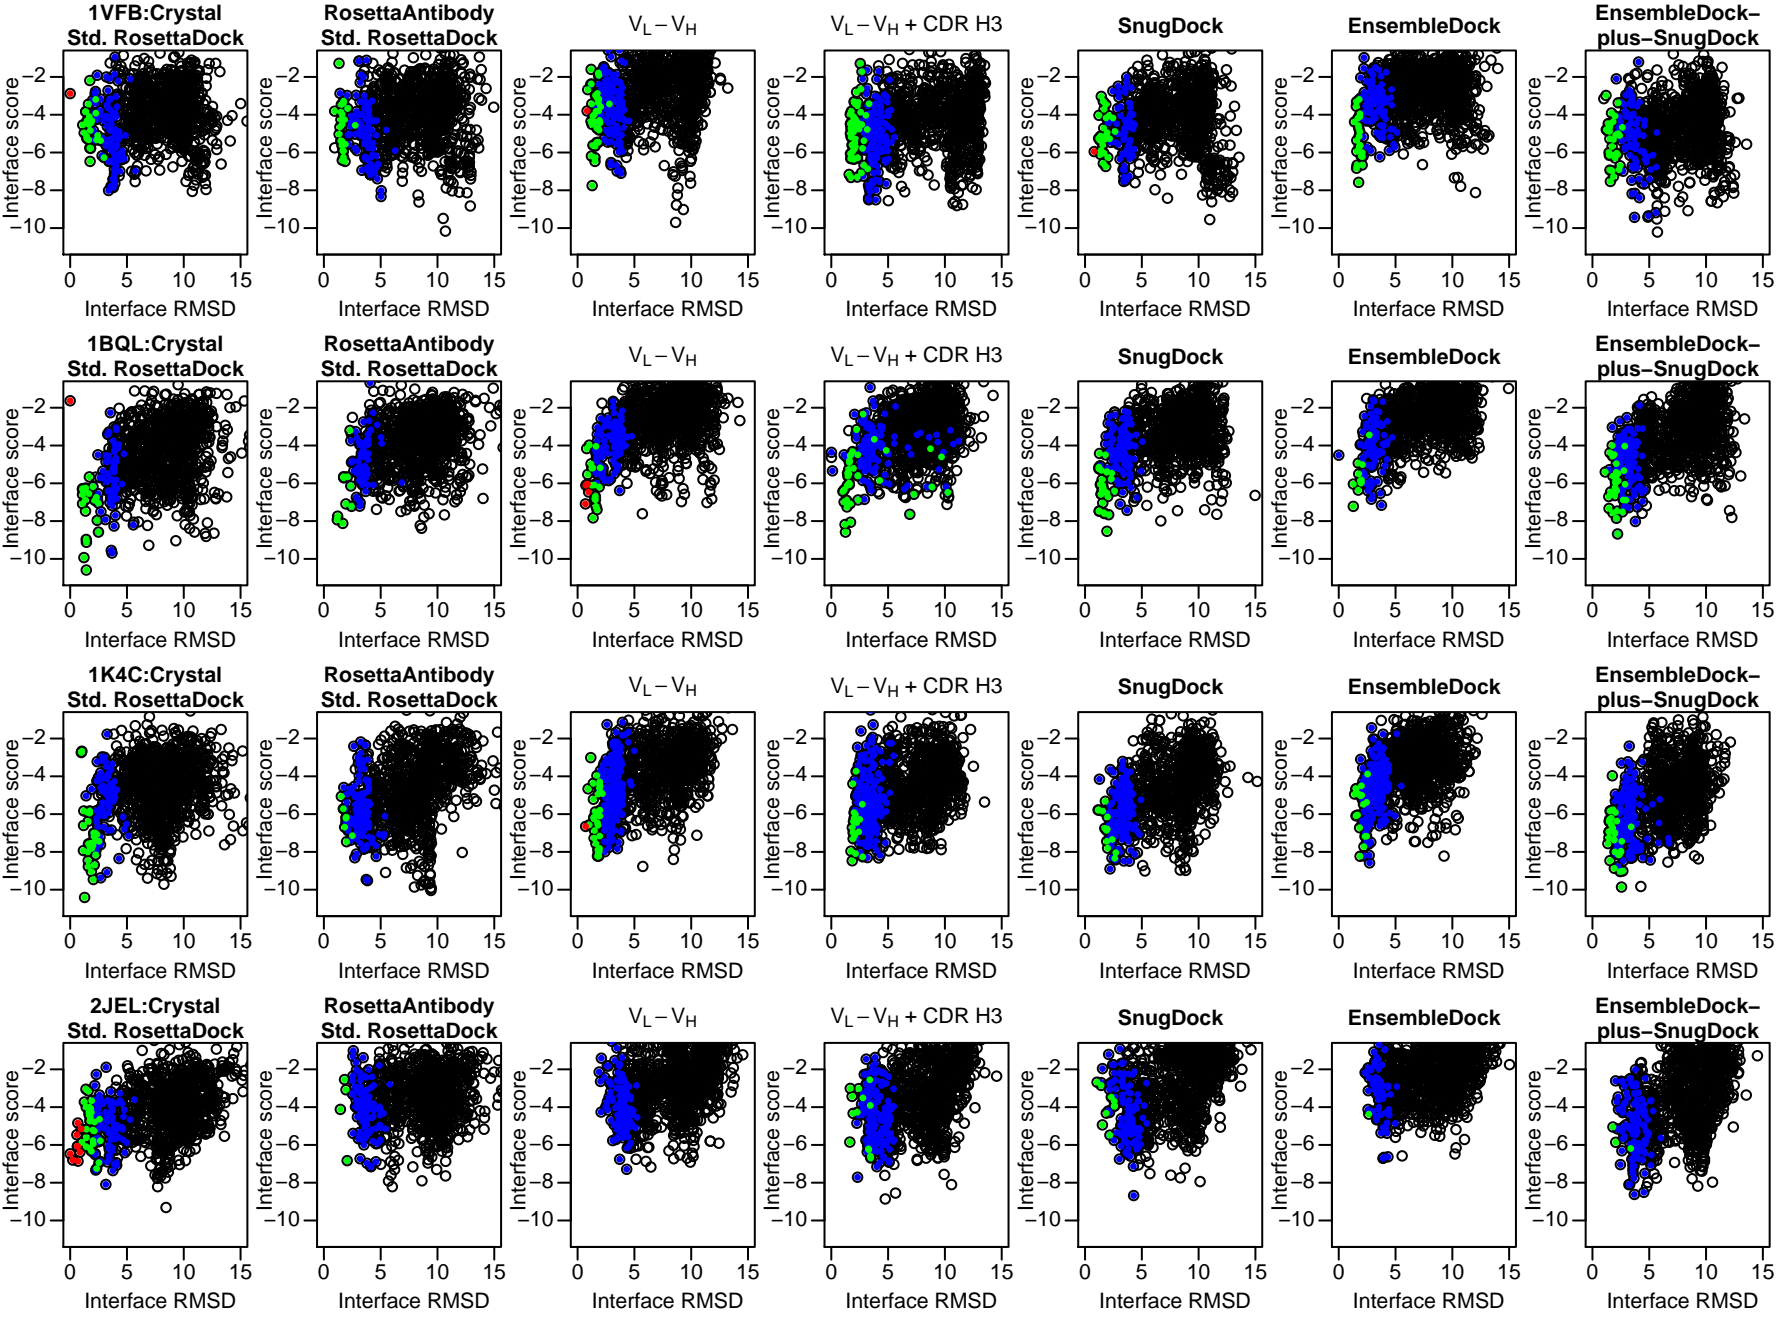

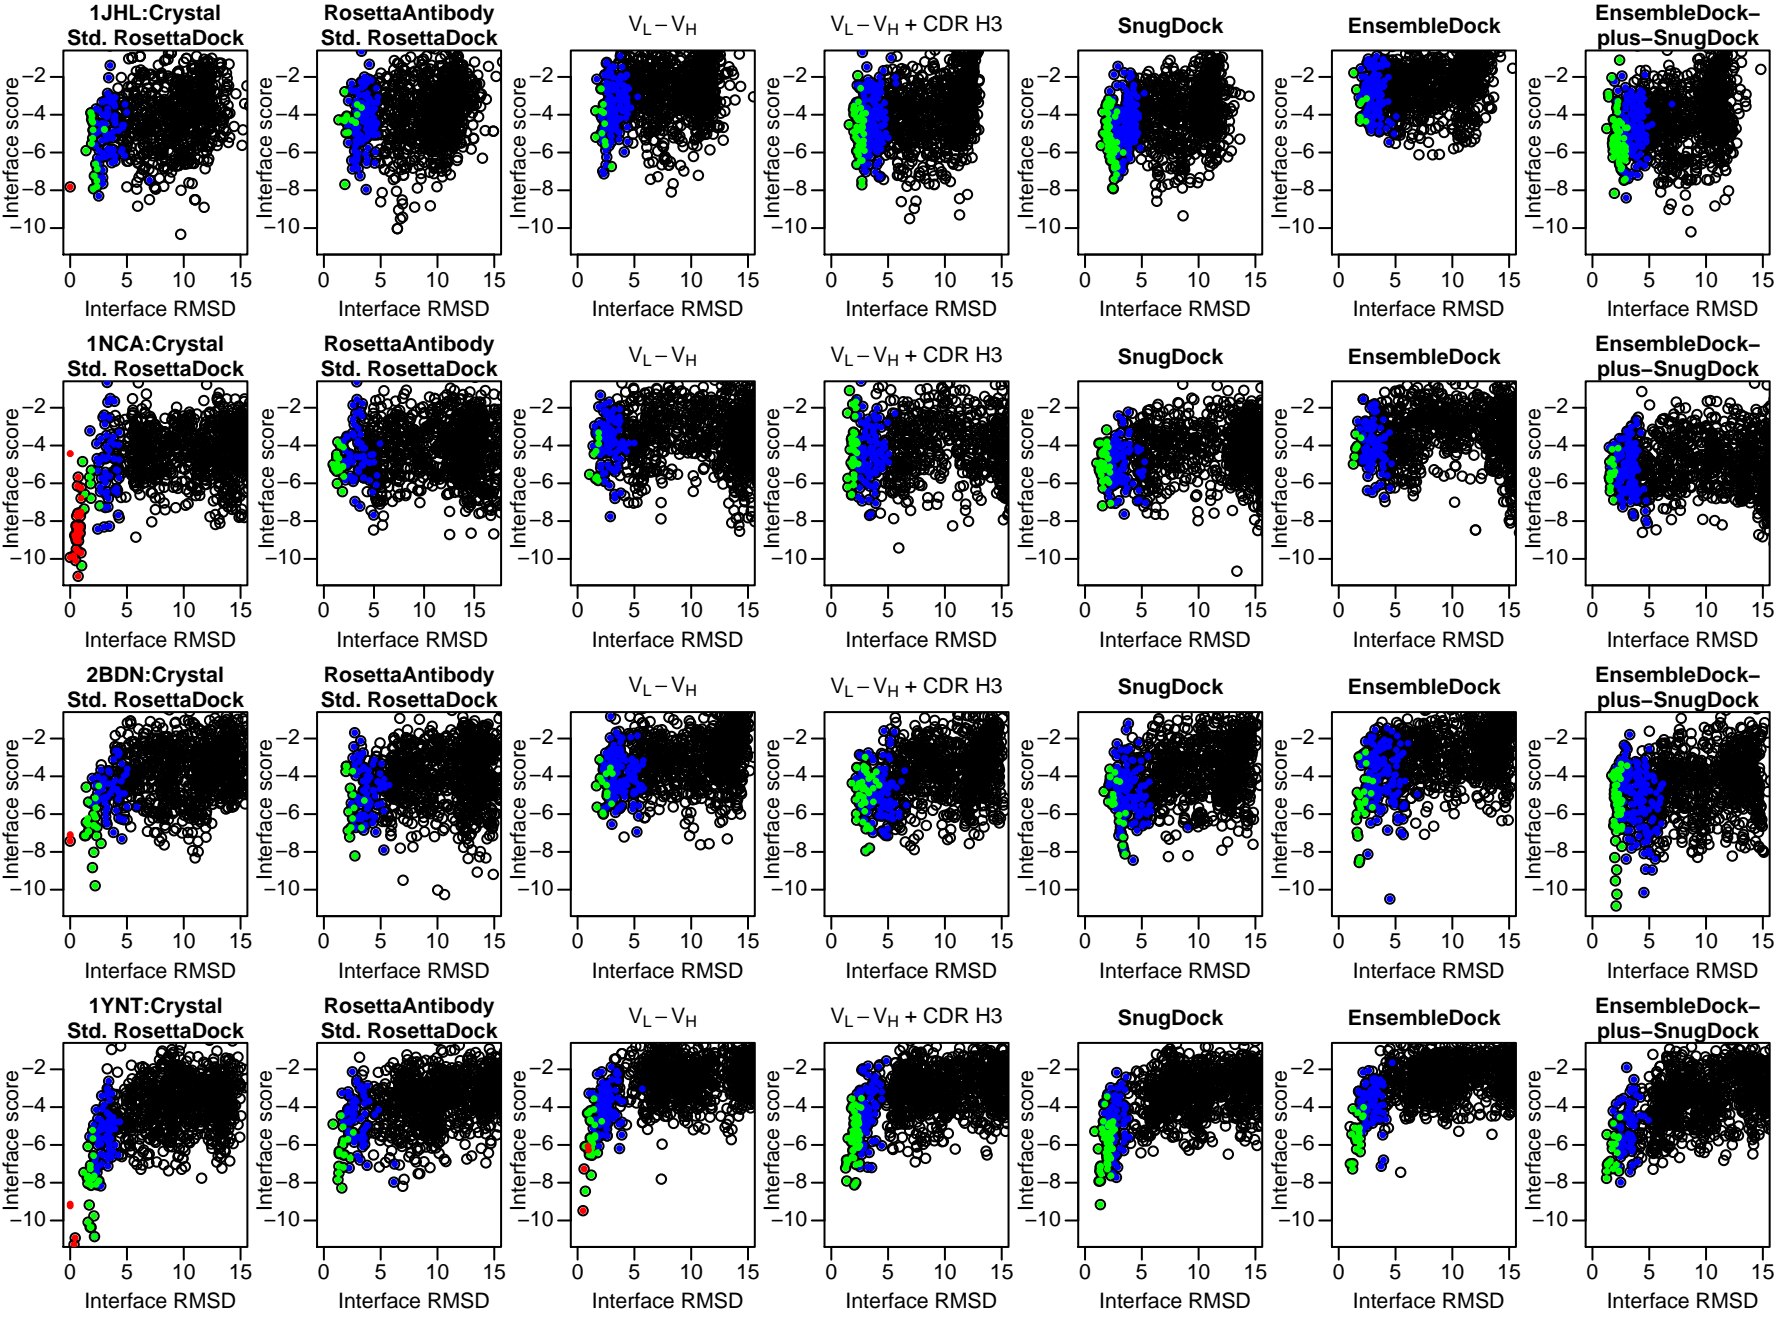

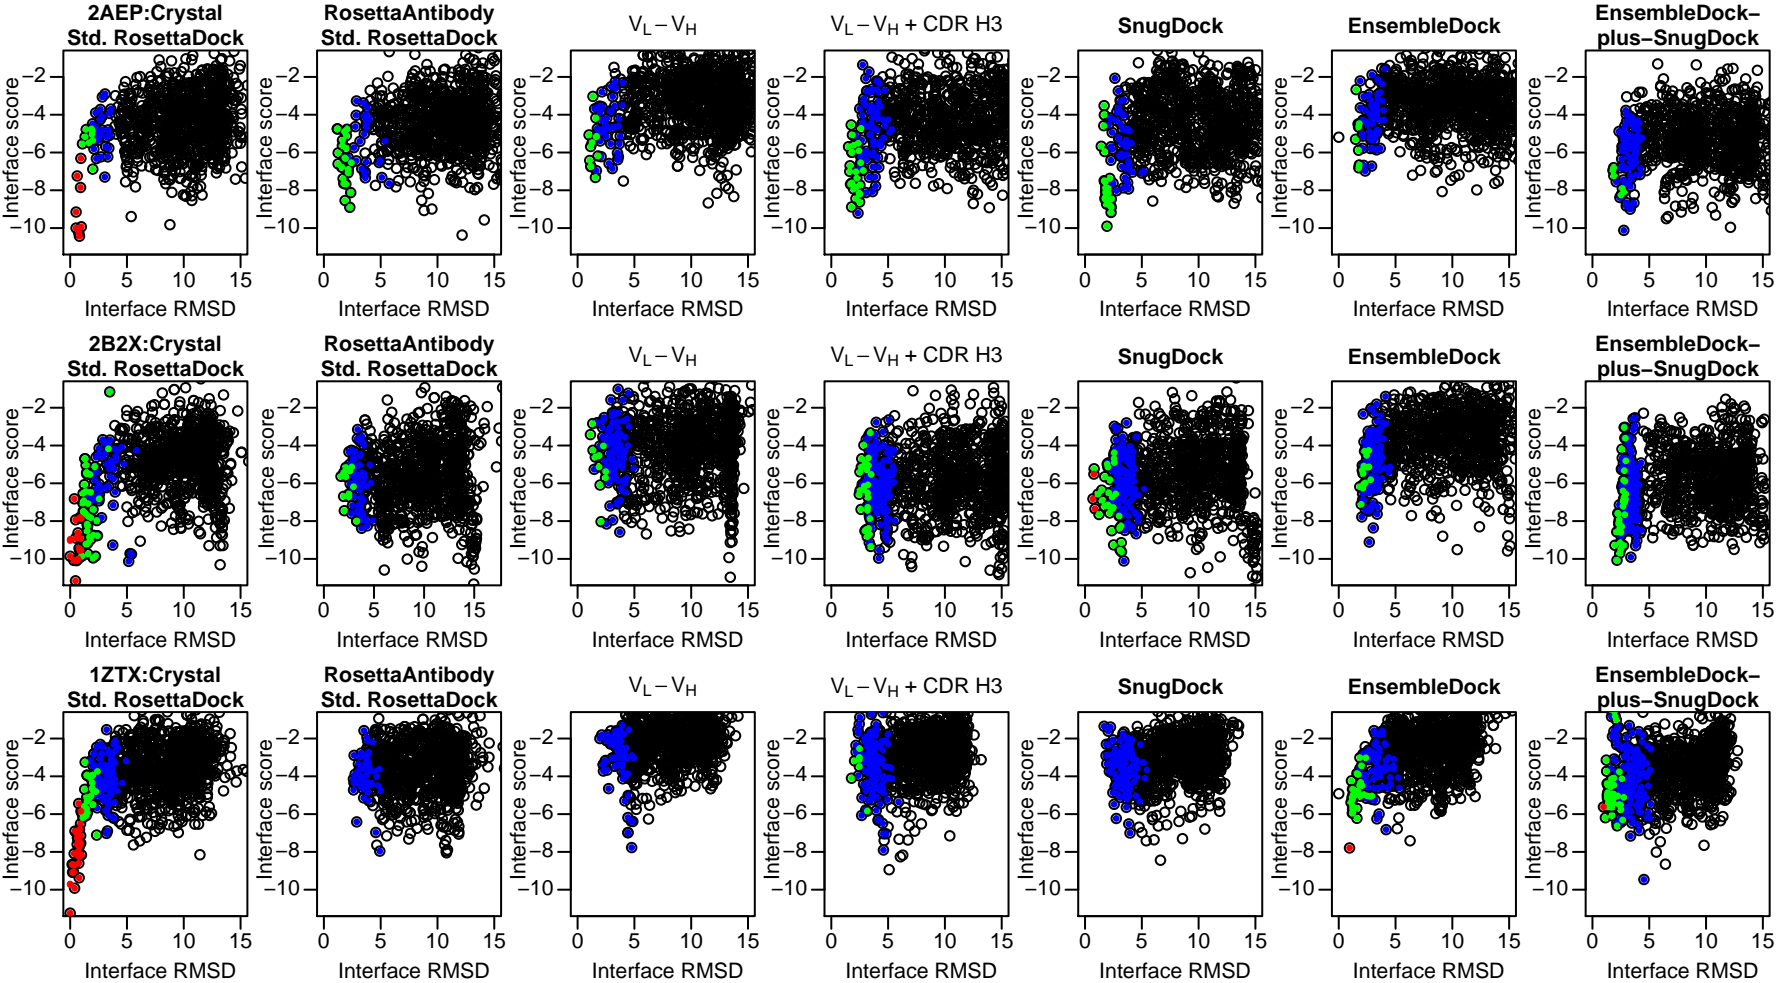

Supplement: S1 (10.1371/journal.pcbi.1000644.s001) [file journal.pcbi.1000644.s001]
