# Supplementary material for: SnugDock: Paratope Structural Optimization during Antibody-Antigen Docking Compensates for Errors in Antibody Homology Models
Source: PLoS Comput Biol. 2010 Jan 22;6(1):e1000644. doi: 10.1371/journal.pcbi.1000644 (PMC2800046; doi:10.1371/journal.pcbi.1000644)
Supplement: Table S1 — Quantitative accuracy measures of lowest-energy docking decoy for different docking protocols. Refer to Table 1 key for explanation. (0.03 MB XLS) [file pcbi.1000644.s003.xls]

## Sheet: Sheet1
Table S1: Quantitative accuracy measures of lowest-energy docking decoy for different docking protocols. Refer to Table 1 key for explanation.
	Crystal					RosettaAntibody Homology Model
Co-crystal PDB ID	Standard RosettaDock					Standard RosettaDock					Optimize VL-VH RosettaDock					Optimize VL-VH Minimize CDRs Relax H3 RosettaDock					Optimize VL-VH Minimize CDRs Relax H3+H2 RosettaDock (SnugDock)					Rigid Body Ensemble					EnsembleDock-plus-SnugDock
	Ligand RMSD	Interface RMSD	Fraction of Native Contacts	CAPRI Rating		Ligand RMSD	Interface RMSD	Fraction of Native Contacts	CAPRI Rating		Ligand RMSD	Interface RMSD	Fraction of Native Contacts	CAPRI Rating		Ligand RMSD	Interface RMSD	Fraction of Native Contacts	CAPRI Rating		Ligand RMSD	Interface RMSD	Fraction of Native Contacts	CAPRI Rating		Ligand RMSD	Interface RMSD	Fraction of Native Contacts	CAPRI Rating		Ligand RMSD	Interface RMSD	Fraction of Native Contacts	CAPRI Rating
	(Å)	(Å)				(Å)	(Å)				(Å)	(Å)				(Å)	(Å)				(Å)	(Å)				(Å)	(Å)				(Å)	(Å)
1mlc	14.2	8.8	0.02	0		10.4	3.3	0.04	0		21.8	8.6	0	0		20.6	10.9	0.14	0		3.1	1.5	0.57	**		12.5	7.4	0.02	0		4	2.3	0.29	*
1ahw	7.6	2.7	0.55	**		42.7	16.7	0	0		5.4	2.5	0.36	*		6.8	2.3	0.34	*		4.5	2.4	0.33	**		6.6	2.4	0.42	*		4.9	2.5	0.32	**
1jps	8.7	3	0.58	**		7.3	2.3	0.46	*		7.7	2.5	0.31	*		6.6	3.3	0.25	*		4.9	1.9	0.54	**		5.2	1.9	0.55	**		10.1	3.3	0.23	*
1wej	6.9	3	0.56	**		19.7	11.3	0.02	0		8.7	4.1	0.19	*		5.5	3.3	0.3	*		6.9	2.9	0.49	*		6.9	3.6	0.28	*		5.6	3.3	0.3	*
1vfb	20.8	12	0.02	0		18.2	10.7	0.11	0		18.2	10.6	0.11	0		18.8	11.1	0.09	0		18.7	11	0.11	0		21.3	12	0.02	0		11.9	5.7	0.02	0
1bql	4.4	1.4	0.8	**		19.1	8.6	0.18	0		3.9	1.2	0.88	**		7.7	1.3	0.76	**		6.9	1.9	0.71	**		4	1.3	0.65	**		8.9	2.2	0.53	**
1k4c	6.9	2	0.58	**		32.2	9.4	0.1	0		22.9	6.7	0.19	0		6.8	1.8	0.5	**		29.4	9.4	0.1	0		10.7	2.7	0.47	*		3.7	2.6	0.4	**
2jel	16.2	9.8	0.12	0		11.2	6	0.04	0		8.3	4.4	0.27	*		12.8	4.8	0.27	0		8.6	4.3	0.25	*		8.4	3.9	0.16	*		7.6	3.7	0.12	*
1jhl	25.4	10.6	0.07	0		13.18	6.5	0.02	0		13.6	6.9	0.02	0		14.1	6.9	0.05	0		19.1	8.6	0	0		17.8	8.3	0.02	0		19.1	8.7	0.07	0
1nca	1.8	1.2	0.87	**		30.4	12.6	0.09	0		27.6	15.3	0.01	0		11.1	5.9	0.13	0		23.5	13.4	0	0		30.3	15.9	0.03	0		31.5	18.1	0.05	0
2bdn	4.3	2.9	0.51	**		17.5	10.6	0.06	0		12.8	6.7	0.1	0		5.5	3	0.55	**		8.9	4.2	0.39	*		8.6	4.5	0.14	*		3.7	2.1	0.61	**
1ynt	5.4	1.3	0.92	**		5.6	1.6	0.65	**		3.5	1.3	0.74	**		6.3	2	0.53	**		5.3	1.4	0.69	**		15	5.6	0.04	0		8.6	2.5	0.4	*
2aep	1.6	0.5	0.88	***		25.7	12.2	0	0		3.1	1.6	0.58	**		6.7	2.4	0.48	*		3.7	1.9	0.62	**		19.9	9.1	0.06	0		5.7	2.8	0.45	*
2b2x	1.6	0.6	0.95	***		23.5	15.2	0	0		34	15	0.02	0		23.7	14.8	0.02	0		24.5	14.8	0.03	0		24.8	14.9	0.02	0		24.5	14.8	0.03	0
1ztx	1	0.5	0.81	***		23.8	10.8	0	0		13.6	5.4	0.07	0		10.8	5.1	0.14	0		13.6	6.6	0.14	0		2.1	1	0.77	***		8.7	4.5	0.11	*
