# Supplementary material for: SnugDock: Paratope Structural Optimization during Antibody-Antigen Docking Compensates for Errors in Antibody Homology Models
Source: PLoS Comput Biol. 2010 Jan 22;6(1):e1000644. doi: 10.1371/journal.pcbi.1000644 (PMC2800046; doi:10.1371/journal.pcbi.1000644)
Supplement: Table S2 — Quantitative accuracy measures of lowest-energy docking decoy, using WAM homology models. Refer to Table 1 key for explanation. (0.03 MB XLS) [file pcbi.1000644.s004.xls]

## Sheet: Sheet1
Table S2: Quantitative accuracy measures of lowest-energy docking decoy, using WAM homology models. Refer to Table 1 key for explanation.
Co-crystal PDB ID	Standard RosettaDock					SnugDock
	Ligand RMSD	Interface RMSD	Fraction of Native Contacts	CAPRI Rating		Ligand RMSD	Interface RMSD	Fraction of Native Contacts	CAPRI Rating
	(Å)	(Å)				(Å)	(Å)
1mlc	11.8	6.7	0.18	0		6.4	2.8	0.5	**
1ahw	4.3	2.7	0.34	**		5.3	2.7	0.29	*
1jps	9.5	3.3	0.48	*		7.5	2.1	0.56	**
1wej	29.2	13.4	0.1	0		4.8	2.9	0.35	**
1vfb	17.3	9.6	0.02	0		4.2	1.8	0.62	**
1bql	29.2	13.4	0.08	0		5.9	3.5	0.24	*
1k4c	29.3	9.4	0.11	0		14	2.8	0.32	*
2jel	19.4	11.8	0.16	0		20.2	10.7	0.04	0
1jhl	18.9	8.6	0.05	0		19.3	9	0.05	0
1nca	27.6	14.2	0.04	0		35.7	17.7	0.05	0
2bdn	17.3	5.3	0.14	0		6.4	3.5	0.43	*
1ynt	7.2	2.1	0.62	**		5.6	1.6	0.5	**
2aep	33.3	19.7	0.06	0		4.4	1.7	0.6	**
2b2x	8.9	5.2	0.4	*		6.1	3.7	0.28	*
1ztx	14.4	5.7	0.05	0		15.3	7	0.18	0
